# Supplementary material
Source: HighWire-hosted journal article supplement (https://bmjopen.bmj.com/content/13/4/e063632)
Supplement: inline-supplementary-material-1 [file inline-supplementary-material-1.pdf]

Supplementary Table 1a: Vaccinated, vaccine intended and vaccine hesitancy among pregnant and postnatal women in Australia (August 31, 2021 – November 30, 2021, n<sup>#</sup>=653)

| <b>Intention to receive COVID-19 vaccination during pregnancy once available</b>  | <b>(n=354, %)</b> | <b>(n<sup>*</sup>=334, %)*</b> | <b>Likelihood categories combined</b> | <b>n (%)</b> | <b>n<sup>*</sup>(%)*</b> |
|-----------------------------------------------------------------------------------|-------------------|--------------------------------|---------------------------------------|--------------|--------------------------|
| Yes, I have already had 1 vaccine dose                                            | 5 (1.4)           | 5 (1.4)                        | Vaccinated                            | 301 (85.0)   | 281 (79.3)               |
| Yes, I have already had 2 vaccine doses                                           | 296 (83.6)        | 276 (82.6)                     |                                       |              |                          |
| Yes I will book soon                                                              | 1 (0.3)           | 1 (0.3)                        |                                       |              |                          |
| Yes I have booked to have the vaccine                                             | 0 (0.0)           | 0 (0.0)                        | Vaccine Intention                     | 27 (7.6)     | 25 (5.1)                 |
| I will have a vaccine after the baby is born                                      | 12 (3.4)          | 11 (3.4)                       |                                       |              |                          |
| I will have a vaccine after I finish breastfeeding                                | 14 (3.9)          | 12 (3.7)                       |                                       |              |                          |
| Unsure                                                                            | 5 (1.4)           | 6 (1.8)                        | Vaccine Hesitancy                     | 26 (7.3)     | 29 (5.8)                 |
| I will not have a COVID vaccine at any time                                       | 21 (5.9)          | 23 (6.8)                       |                                       |              |                          |
| <b>Intention to receive COVID-19 vaccination once available (postnatal women)</b> | <b>(n=666, %)</b> | <b>(n<sup>*</sup>=653, %)*</b> | <b>Likelihood categories combined</b> | <b>n (%)</b> | <b>n<sup>*</sup>(%)*</b> |
| Yes, I have already had 1 vaccine dose                                            | 13 (1.9)          | 15 (2.2)                       | Vaccinated                            | 604 (90.7)   | 583 (89.2)               |
| Yes, I have already had 2 vaccine doses                                           | 591 (88.9)        | 568 (87.0)                     |                                       |              |                          |
| Yes I have booked to have the vaccine                                             | 1 (0.1)           | 1 (0.2)                        |                                       |              |                          |
| Yes I will book soon                                                              | 4 (0.6)           | 4 (0.5)                        | Vaccine Intention                     | 18 (2.7)     | 21 (3.2)                 |
| Want to be vaccinated but waiting for Pfizer                                      | 1 (0.1)           | 3 (0.4)                        |                                       |              |                          |
| Want to be vaccinated but until I stop breastfeeding                              | 12 (1.8)          | 13 (2.0)                       |                                       |              |                          |
| Unsure                                                                            | 11 (1.6)          | 15 (2.2)                       | Vaccine Hesitancy                     | 44 (6.6)     | 50 (7.6)                 |
| No, I will not have a COVID vaccine                                               | 33 (4.9)          | 35 (5.4)                       |                                       |              |                          |

Supplementary Table 1b: Vaccinated, vaccine intended, and vaccine hesitancy among pregnant and postnatal women in Australia (December 1, 2021 – March 1, 2022, n<sup>#</sup>=649)

| <b>Intention to receive COVID-19 vaccination during pregnancy once available</b>  | <b>(n= 522 , %)</b> | <b>(n<sup>*</sup>=504, %)*</b> | <b>Likelihood categories combined</b> | <b>n (%)</b> | <b>n<sup>*</sup>(%)*</b> |
|-----------------------------------------------------------------------------------|---------------------|--------------------------------|---------------------------------------|--------------|--------------------------|
| Yes, I have already had 1 vaccine dose                                            | 130 (24.9)          | 122(24.2)                      | Vaccinated                            | 332 (63.6)   | 306 (60.6)               |
| Yes, I have already had 2 vaccine doses                                           | 202 (38.7)          | 184(36.4)                      |                                       |              |                          |
| Yes I will book soon                                                              | 7 (1.3)             | 9 (1.7)                        |                                       |              |                          |
| Yes I have booked to have the vaccine                                             | 45 (8.4)            | 45 (8.8)                       | Vaccine Intention                     | 139 (26.6)   | 142 (28.1)               |
| I will have a vaccine after the baby is born                                      | 60 (11.5)           | 59 (11.6)                      |                                       |              |                          |
| I will have a vaccine after I finish breastfeeding                                | 28 (5.3)            | 30(5.9)                        |                                       |              |                          |
| Unsure                                                                            | 27 (5.2)            | 28 (5.5)                       | Vaccine Hesitancy                     | 51 (9.8)     | 57 (11.4)                |
| I will not have a COVID vaccine at any time                                       | 24 (4.6)            | 29 (5.8)                       |                                       |              |                          |
| <b>Intention to receive COVID-19 vaccination once available (postnatal women)</b> | <b>(n=686, %)</b>   | <b>(n<sup>*</sup>=649, %)*</b> | <b>Likelihood categories combined</b> | <b>n (%)</b> | <b>n<sup>*</sup>(%)*</b> |
| Yes, I have already had 1 vaccine dose                                            | 198 (28.9)          | 186 (28.7)                     | Vaccinated                            | 515 (75.1)   | 477 (73.4)               |
| Yes, I have already had 2 vaccine doses                                           | 317 (46.2)          | 291 (44.8)                     |                                       |              |                          |
| Yes I have booked to have the vaccine                                             | 65 (9.5)            | 61 (9.4)                       |                                       |              |                          |
| Yes I will book soon                                                              | 20 (2.9)            | 21 (3.2)                       | Vaccine Intention                     | 124 (18.1)   | 123 (19.0)               |
| Want to be vaccinated but waiting for Pfizer                                      | 21 (3.0)            | 24 (3.7)                       |                                       |              |                          |
| Want to be vaccinated but until I stop breastfeeding                              | 18 (2.6)            | 25 (3.8)                       |                                       |              |                          |
| Unsure                                                                            | 23 (3.4)            | 22 (3.4)                       | Vaccine Hesitancy                     | 47 (6.8)     | 49 (7.6)                 |
| No, I will not have a COVID vaccine                                               | 24 (3.5)            | 19 (2.9)                       |                                       |              |                          |

Supplementary Table 2: Characteristics of the study participants, prevalence and 95%CI of pregnant women according to vaccine status, intention and hesitancy (n#=838)

| Variable                                    | n (%)      | n# (%)#    | Vaccinated       | Vaccination intentions | Vaccine Hesitancy   |
|---------------------------------------------|------------|------------|------------------|------------------------|---------------------|
|                                             |            |            | Pr [95%CI]       | Pr [95%CI]             | Pr [95%CI]          |
| <b>Month of survey</b>                      |            |            |                  |                        |                     |
| August 31, 2021-November 30, 2021           | 354 (40.4) | 334 (39.8) | 83.9 [79.3,87.7] | 7.4 [5.1,10.6]         | 8.7 [5.8,12.7]***   |
| December 1, 2021 - March 1, 2022            | 522 (59.6) | 504 (60.2) | 60.6 [55.9,65.1] | 28.1 [24.1,32.5]       | 11.4 [8.5,15.1]     |
| <b>State/Territory in Australia (n=833)</b> |            |            |                  |                        |                     |
| NSW                                         | 420 (47.9) | 408 (48.6) | 74.3 [69.5,78.7] | 18.6 [14.8,23.1]       | 7.1 [4.8,10.4]*     |
| VIC                                         | 244 (27.8) | 226 (26.9) | 70.8 [64.1,76.7] | 17.0 [12.6,22.6]       | 12.2 [7.9,18.3]     |
| Others                                      | 207 (23.6) | 199 (23.7) | 61.7 [54.3,68.6] | 24.4 [18.8,31.1]       | 13.9 [9.1,20.7]     |
| <b>Age in category</b>                      |            |            |                  |                        |                     |
| < 30 years                                  | 251 (28.7) | 307 (36.6) | 57.8 [51.0,64.3] | 26.9 [21.4,33.2]       | 15.3 [10.7,21.4]*** |
| 30+ years                                   | 625 (71.3) | 531 (63.4) | 76.9 [73.3,80.1] | 15.7 [13.0,18.8]       | 7.4 [5.5,9.8]       |
| <b>Education status</b>                     |            |            |                  |                        |                     |
| Graduate                                    | 617 (70.4) | 565 (67.5) | 77.6 [73.9,80.9] | 15.5 [12.8,18.7]       | 6.9 [4.9,9.5]***    |
| TAFE or Diploma                             | 185 (21.1) | 193 (23.0) | 53.6 [45.6,61.4] | 27.4 [20.8,35.2]       | 19.0 [13.1,26.7]    |
| Year 12 or less                             | 74 (8.5)   | 80 (9.5)   | 54.6 [41.9,66.7] | 31.9 [21.5,44.5]       | 13.5 [6.6,25.8]     |
| <b>Employment status</b>                    |            |            |                  |                        |                     |
| Paid                                        | 373 (42.5) | 338 (40.3) | 78.0 [73.2,82.0] | 17.2 [13.6,21.5]       | 4.8 [2.9,8.0]***    |
| Part-time                                   | 196 (22.4) | 194 (23.2) | 65.5 [57.6,72.6] | 21.3 [15.4,28.7]       | 13.2 [8.6,19.8]     |
| Unpaid                                      | 307 (35.1) | 306 (36.5) | 63.8 [57.7,69.5] | 21.8 [17.2,27.1]       | 14.5 [10.4,19.8]    |
| <b>Combined Income AUD (n=788)</b>          |            |            |                  |                        |                     |
| < \$80k                                     | 114 (13.0) | 125 (14.9) | 52.1 [41.8,62.1] | 22.2 [14.7,32.0]       | 25.8 [17.4,36.4]*** |

|                                                         |            |            |                  |                  |                     |
|---------------------------------------------------------|------------|------------|------------------|------------------|---------------------|
| \$80 to <\$150,000                                      | 348 (39.7) | 338 (40.3) | 70.3 [65.0,75.2] | 22.2 [17.9,27.1] | 7.5 [4.9,11.3]      |
| \$150,000 to > \$200,000                                | 369 (42.1) | 325 (38.8) | 79.6 [75.1,83.5] | 15.1 [11.7,19.2] | 5.3 [3.4,8.3]       |
| <b>Country of birth</b>                                 |            |            |                  |                  |                     |
| Australia                                               | 763 (87.1) | 738 (88.0) | 69.5 [65.8,73.1] | 20.0 [17.1,23.3] | 10.5 [8.1,13.4]     |
| others                                                  | 113 (12.9) | 100 (12.0) | 72.4 [63.2,80.0] | 18.7 [12.5,27.1] | 8.9 [4.7,16.4]      |
| <b>Speak language other than English at home</b>        |            |            |                  |                  |                     |
| No                                                      | 804 (91.8) | 767 (91.4) | 71.0 [67.4,74.3] | 19.5 [16.7,22.6] | 9.6 [7.4,12.2]      |
| Yes                                                     | 72 (8.2)   | 71 (8.6)   | 58.5 [45.5,70.4] | 23.5 [14.6,35.6] | 18.0 [9.2,32.3]     |
| <b>Relationship status</b>                              |            |            |                  |                  |                     |
| Partner                                                 | 837 (95.6) | 794 (94.7) | 70.6 [67.1,73.8] | 19.9 [17.2,23.0] | 9.5 [7.4,12.1]*     |
| Single                                                  | 39 (4.4)   | 44 (5.3)   | 57.7 [39.4,74.2] | 17.8 [7.7,36.0]  | 24.5 [11.1,45.8]    |
| <b>Lived or work in a suburb of high COVID</b>          |            |            |                  |                  |                     |
| Yes                                                     | 357 (40.7) | 343 (40.9) | 75.4 [70.0,80.2] | 15.2 [11.5,19.9] | 9.3 [6.3,13.7]*     |
| No                                                      | 519 (59.3) | 495 (59.1) | 66.0 [61.5,70.3] | 23.0 [19.4,27.1] | 11.0 [8.2,14.6]     |
| <b>Pregnancy gestation</b>                              |            |            |                  |                  |                     |
| < 28 weeks                                              | 277 (31.6) | 266 (31.8) | 65.5 [59.2,71.3] | 17.6 [13.4,22.8] | 16.9 [12.3,22.7]*** |
| >= 28 weeks                                             | 599 (68.4) | 572 (68.2) | 71.9 [67.8,75.7] | 20.9 [17.5,24.7] | 7.2 [5.1,10.2]      |
| <b>Parity (n=837)</b>                                   |            |            |                  |                  |                     |
| Primiparous                                             | 715 (81.6) | 696 (83.0) | 70.8 [67.0,74.4] | 19.9 [16.9,23.3] | 9.3 [6.9,12.3]      |
| Multiparous                                             | 160 (18.2) | 141 (16.8) | 65.8 [57.9,72.9] | 19.6 [14.1,26.7] | 14.6 [9.7,21.2]     |
| <b>Do you have any risk factors for your pregnancy?</b> |            |            |                  |                  |                     |
| No, I believe I have no risk factors                    | 511 (58.3) | 488 (58.2) | 67.3 [62.7,71.6] | 22.2 [18.4,26.4] | 10.5 [7.8,14.1]     |
| Yes, I have been told I have some mild                  | 272 (31.1) | 262 (31.3) | 71.6 [65.3,77.1] | 17.8 [13.5,23.2] | 10.6 [6.8,16.1]     |

|                                                                                      |            |            |                  |                  |                   |
|--------------------------------------------------------------------------------------|------------|------------|------------------|------------------|-------------------|
| Yes, I have been told I have some serious                                            | 93 (10.6)  | 88 (10.6)  | 79.1 [69.3,86.4] | 12.9 [7.4,21.5]  | 8.0 [3.8,16.1]    |
| <b>Main maternity care provider</b>                                                  |            |            |                  |                  |                   |
| GP shared Public Others                                                              | 377 (43.0) | 371 (44.3) | 67.2 [61.6,72.3] | 22.1 [17.8,27.1] | 10.7 [7.4,15.4]*  |
| Private obstetrician/GP obstetrician                                                 | 210 (24.0) | 202 (24.0) | 64.9 [57.6,71.6] | 21.5 [16.2,28.0] | 13.6 [9.1,19.9]   |
| Midwifery continuity of care                                                         | 289 (33.0) | 265 (31.7) | 77.5 [72.0,82.2] | 15.4 [11.4,20.3] | 7.2 [4.6,11.0]    |
| <b>Suspected that you, or anyone else you know personally, has had COVID (n=828)</b> |            |            |                  |                  |                   |
| Yes                                                                                  | 335 (38.2) | 318 (38.1) | 81.2 [76.2,85.3] | 11.9 [8.6,16.2]  | 6.9 [4.4,10.6]*** |
| No                                                                                   | 530 (60.5) | 510 (60.9) | 62.9 [58.3,67.3] | 24.6 [20.9,28.8] | 12.4 [9.4,16.3]   |
| <b>How satisfied are you with your life</b>                                          |            |            |                  |                  |                   |
| Very satisfied                                                                       | 333 (38.0) | 311 (37.1) | 75.3 [70.1,79.9] | 16.6 [12.8,21.2] | 8.1 [5.4,12.0]*** |
| Satisfied                                                                            | 462 (52.7) | 442 (52.7) | 70.4 [65.6,74.9] | 19.6 [16.0,23.8] | 10.0 [7.0,14.0]   |
| Dissatisfied                                                                         | 81 (9.3)   | 85 (10.2)  | 47.2 [35.6,59.0] | 32.9 [22.4,45.6] | 19.9 [12.1,31.0]  |

#Weighted sample; Pr = prevalence; \*\*\*, \*\* and \* denote p-values of 0.001, 0.01 and 0.05 respectively obtained from Chi-square test. n=838 otherwise stated within brackets.

Supplementary Table 3: Characteristics of the study participants, prevalence and 95%CI of postnatal women according to vaccine status, intention and hesitancy (n#=1,302)

| Variable                                     | n (%)      | n* (%)*    | Vaccinated       | Vaccination intentions | Vaccine Hesitancy |
|----------------------------------------------|------------|------------|------------------|------------------------|-------------------|
|                                              |            |            | Pr [95%CI]       | Pr [95%CI]             | Pr [95%CI]        |
| <b>Month of survey</b>                       |            |            |                  |                        |                   |
| August 31, 2021-November 30, 2021            | 666 (49.3) | 653 (50.2) | 89.2 [86.1,91.8] | 3.2 [1.9,5.2]          | 7.6 [5.5,10.5]*** |
| December 1, 2021 - March 1, 2022             | 686 (50.7) | 649 (49.8) | 73.4 [69.6,77.0] | 19.0 [15.9,22.4]       | 7.6 [5.6,10.2]    |
| <b>State/Territory in Australia (n=1297)</b> |            |            |                  |                        |                   |
| NSW                                          | 596 (44.1) | 566 (43.5) | 82.7 [79.0,85.9] | 11.0 [8.5,14.1]        | 6.3 [4.3,9.1]**   |

|                                                  |             |             |                  |                  |                     |
|--------------------------------------------------|-------------|-------------|------------------|------------------|---------------------|
| VIC                                              | 365 (27.0)  | 342 (26.3)  | 86.0 [81.6,89.4] | 8.6 [6.0,12.1]   | 5.4 [3.3,8.8]       |
| Others                                           | 388 (28.7)  | 389 (29.9)  | 75.3 [70.1,80.0] | 13.4 [10.0,17.8] | 11.2 [8.0,15.6]     |
| <b>Age in category</b>                           |             |             |                  |                  |                     |
| < 30 years                                       | 358 (26.5)  | 464 (35.6)  | 75.1 [69.6,79.9] | 13.7 [10.2,18.3] | 11.2 [7.9,15.8]**   |
| 30+ years                                        | 994 (73.5)  | 838 (64.4)  | 84.9 [82.5,86.9] | 9.6 [7.9,11.6]   | 5.6 [4.3,7.2]       |
| <b>Education status</b>                          |             |             |                  |                  |                     |
| Graduate                                         | 968 (71.6)  | 879 (67.6)  | 84.4 [81.7,86.7] | 10.3 [8.4,12.6]  | 5.3 [3.9,7.1]**     |
| TAFE or diploma                                  | 249 (18.4)  | 256 (19.6)  | 76.4 [70.1,81.7] | 12.4 [8.6,17.7]  | 11.2 [7.6,16.2]     |
| Year 12 or less                                  | 135 (10.0)  | 166 (12.8)  | 73.0 [63.1,81.0] | 12.7 [7.4,20.9]  | 14.4 [8.4,23.5]     |
| <b>Employment status</b>                         |             |             |                  |                  |                     |
| Paid                                             | 776 (57.4)  | 720 (55.3)  | 83.6 [80.5,86.3] | 10.1 [8.0,12.6]  | 6.3 [4.6,8.7]       |
| Part-time                                        | 86 (6.4)    | 83 (6.4)    | 86.3 [77.6,92.0] | 8.2 [4.1,15.7]   | 5.5 [2.3,12.7]      |
| Unpaid                                           | 490 (36.2)  | 499 (38.3)  | 77.3 [72.7,81.4] | 12.9 [9.9,16.8]  | 9.8 [7.0,13.5]      |
| <b>Combined Income (n=1249)</b>                  |             |             |                  |                  |                     |
| <AUD \$80k                                       | 162 (12.0)  | 209 (16.0)  | 63.8 [55.0,71.9] | 18.6 [12.7,26.6] | 17.5 [11.8,25.2]*** |
| \$80 to <\$150,000                               | 555 (41.0)  | 535 (41.1)  | 81.1 [77.2,84.5] | 11.7 [9.1,14.9]  | 7.2 [4.9,10.3]      |
| \$150,000 to > \$200,000                         | 576 (42.6)  | 505 (38.8)  | 88.7 [85.8,91.0] | 7.1 [5.3,9.6]    | 4.2 [2.8,6.2]       |
| <b>Country</b>                                   |             |             |                  |                  |                     |
| Australia                                        | 1181 (87.4) | 1143 (87.8) | 81.3 [78.6,83.7] | 11.2 [9.4,13.4]  | 7.5 [5.9,9.5]       |
| others                                           | 171 (12.6)  | 159 (12.2)  | 82.0 [74.7,87.5] | 9.6 [6.1,14.8]   | 8.4 [4.5,15.3]      |
| <b>Speak language other than English at home</b> |             |             |                  |                  |                     |
| No                                               | 1243 (91.9) | 1203 (92.4) | 81.7 [79.1,84.0] | 10.8 [9.0,12.9]  | 7.5 [5.9,9.5]       |
| Yes                                              | 109 (8.1)   | 99 (7.6)    | 77.2 [68.4,84.2] | 14.0 [8.7,21.8]  | 8.8 [4.7,15.7]      |

|                                                                                       |             |             |                  |                  |                   |
|---------------------------------------------------------------------------------------|-------------|-------------|------------------|------------------|-------------------|
| <b>Marital status</b>                                                                 |             |             |                  |                  |                   |
| Partner                                                                               | 1304 (96.4) | 1247 (95.8) | 81.7 [79.2,84.0] | 11.1 [9.3,13.1]  | 7.2 [5.7,9.0]     |
| Single                                                                                | 48 (3.6)    | 55 (4.2)    | 73.5 [55.7,86.0] | 10.2 [4.5,21.5]  | 16.3 [6.2,36.4]   |
| <b>Lived or work in a suburb of high COVID</b>                                        |             |             |                  |                  |                   |
| Yes                                                                                   | 375 (27.7)  | 368 (28.3)  | 84.7 [79.7,88.6] | 8.8 [6.0,12.7]   | 6.5 [3.9,10.7]    |
| No                                                                                    | 977 (72.3)  | 934 (71.7)  | 80.1 [77.1,82.7] | 11.9 [9.9,14.4]  | 8.0 [6.3,10.2]    |
| <b>Postpartum period</b>                                                              |             |             |                  |                  |                   |
| <=7 weeks                                                                             | 406 (30.0)  | 398 (30.5)  | 74.6 [69.4,79.2] | 17.9 [14.0,22.5] | 7.5 [4.8,11.6]*** |
| >7 weeks                                                                              | 946 (70.0)  | 904 (69.5)  | 84.3 [81.6,86.8] | 8.0 [6.3,10.2]   | 7.6 [5.9,9.8]     |
| <b>Parity (n=1301)</b>                                                                |             |             |                  |                  |                   |
| Primiparous                                                                           | 736 (54.4)  | 742 (57.0)  | 82.1 [78.7,85.1] | 10.9 [8.7,13.7]  | 6.9 [5.0,9.6]     |
| Multiparous                                                                           | 615 (45.5)  | 559 (43.0)  | 80.3 [76.6,83.6] | 11.2 [8.7,14.3]  | 8.5 [6.3,11.3]    |
| <b>Do you have any risk factors for your pregnancy?</b>                               |             |             |                  |                  |                   |
| No, I believe I have no risk factors                                                  | 638 (47.2)  | 620 (47.6)  | 78.4 [74.4,81.9] | 11.1 [8.6,14.1]  | 10.5 [7.9,13.9]*  |
| Yes, I have been told I have some mild                                                | 498 (36.8)  | 472 (36.2)  | 84.2 [80.5,87.3] | 10.5 [8.0,13.8]  | 5.3 [3.5,7.8]     |
| Yes, I have been told I have some serious                                             | 216 (16.0)  | 210 (16.1)  | 83.7 [77.3,88.6] | 12.0 [7.8,18.2]  | 4.2 [2.3,7.7]     |
| <b>Who is your main maternity care provider</b>                                       |             |             |                  |                  |                   |
| GP shared care / Public Others                                                        | 586 (43.3)  | 581 (44.7)  | 78.8 [74.7,82.4] | 14.3 [11.3,17.8] | 7.0 [4.8,10.0]*** |
| Private obstetrician/GP obstetrician                                                  | 345 (25.6)  | 345 (26.4)  | 74.6 [69.0,79.4] | 11.6 [8.4,15.9]  | 13.8 [10.1,18.6]  |
| Midwifery continuity of care                                                          | 421 (31.1)  | 376 (28.9)  | 91.6 [88.5,93.9] | 5.5 [3.7,8.2]    | 2.9 [1.6,5.0]     |
| <b>Suspected that you, or anyone else you know personally, has had COVID (n=1281)</b> |             |             |                  |                  |                   |
| Yes                                                                                   | 235 (17.4)  | 229 (17.5)  | 84.0 [77.6,88.7] | 10.3 [6.4,16.1]  | 5.7 [3.2,10.1]    |
| No                                                                                    | 1094 (80.9) | 1053 (80.8) | 80.8 [78.1,83.3] | 11.2 [9.3,13.4]  | 8.0 [6.2,10.1]    |

| How satisfied are you with your life |            |            |                  |                 |                 |
|--------------------------------------|------------|------------|------------------|-----------------|-----------------|
| Very satisfied                       | 624 (46.2) | 594 (45.6) | 83.9 [80.3,87.0] | 10.9 [8.3,14.1] | 5.2 [3.5,7.6]   |
| satisfied                            | 599 (44.3) | 577 (44.3) | 79.0 [75.2,82.4] | 11.8 [9.4,14.8] | 9.1 [6.7,12.2]  |
| Dissatisfied                         | 129 (9.5)  | 131 (10.1) | 80.0 [70.5,87.0] | 8.3 [4.2,15.6]  | 11.7 [6.4,20.6] |

#Weighted sample; Pr = prevalence; \*\*\*, \*\* and \* denote p-values of 0.001, 0.01 and 0.05 respectively obtained from Chi-square test. n=1302 otherwise stated within brackets.
